# Supplementary material for: Liquid Biopsy Profiling with Multiple Tests in Patients with Metastatic Breast Cancer
Source: MDPI journal article supplement (doi:10.3390/jmp5020013), 2024-05-09
Supplement: s1 [file s1]

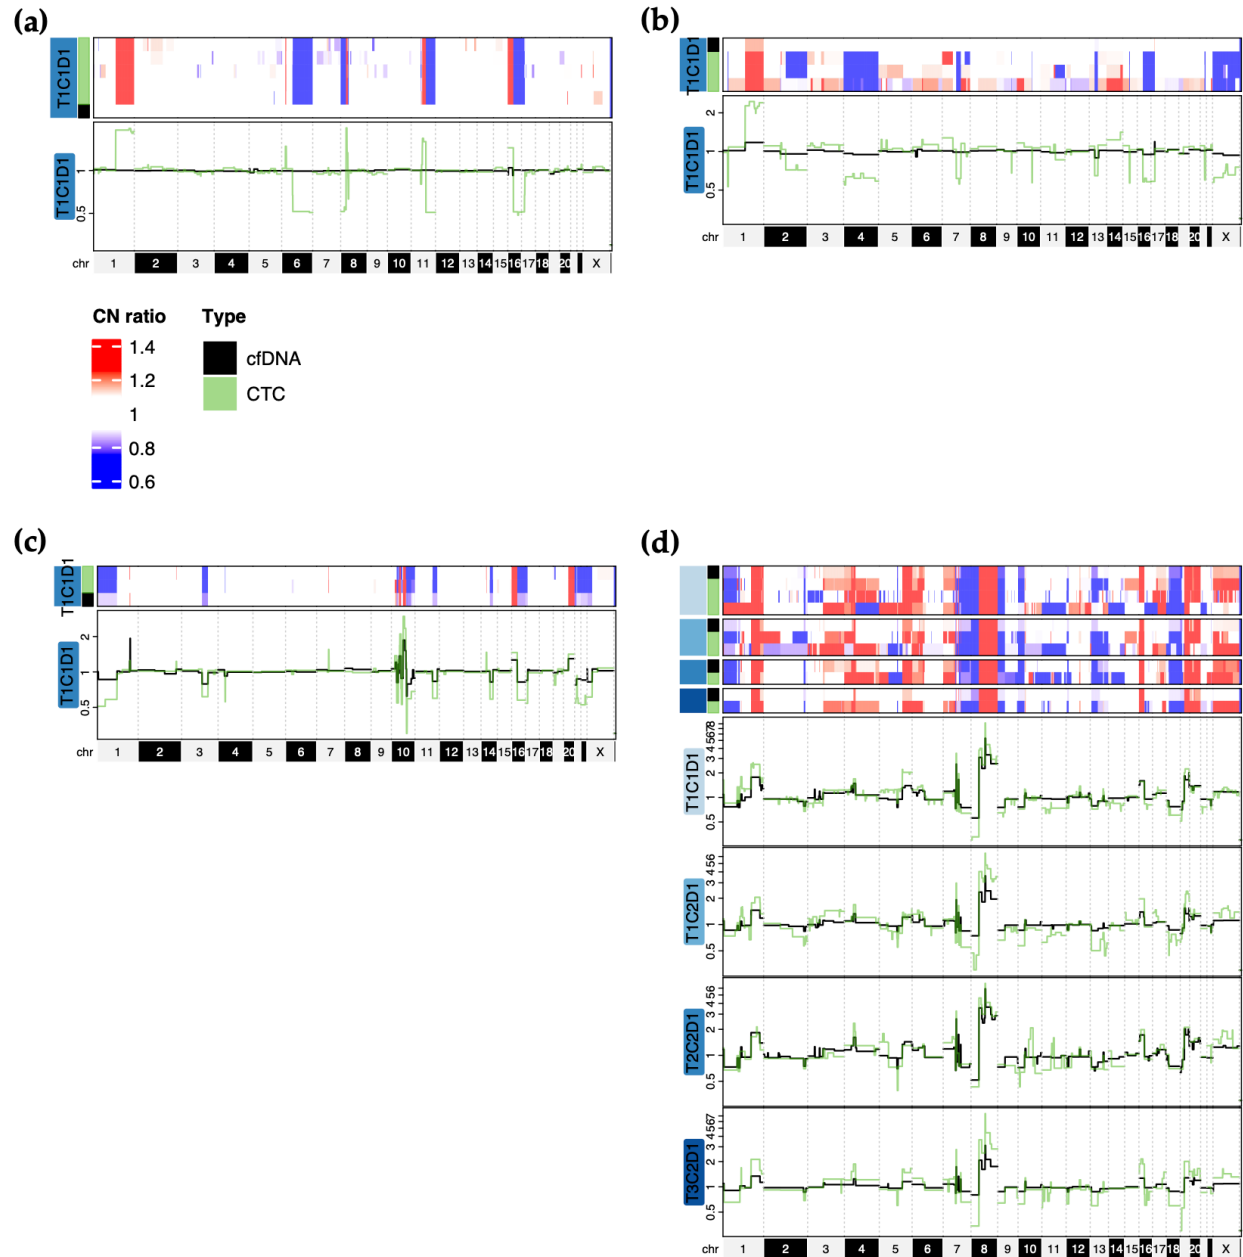

**Supplementary Figure S1.** Comparison of CTC and cfDNA CNAs for four additional patients. (a)-(d) Whole-genome copy number profiles for CTCs and cfDNA from the same blood tube for patients 10, 14, 29, and 5. As in Figure 5, heatmap rows depict profiles for individual CTCs (patient 10: n=5, patient 14: n=3, patient 29: n=2, patient 5: n=7) or cfDNA and are colored by the ratio to the genome-wide mean according to the scale shown in (a). An overlay of the cfDNA (black) and single or averaged CTC (green) profiles are also shown below each heatmap, along with chromosome numbers.

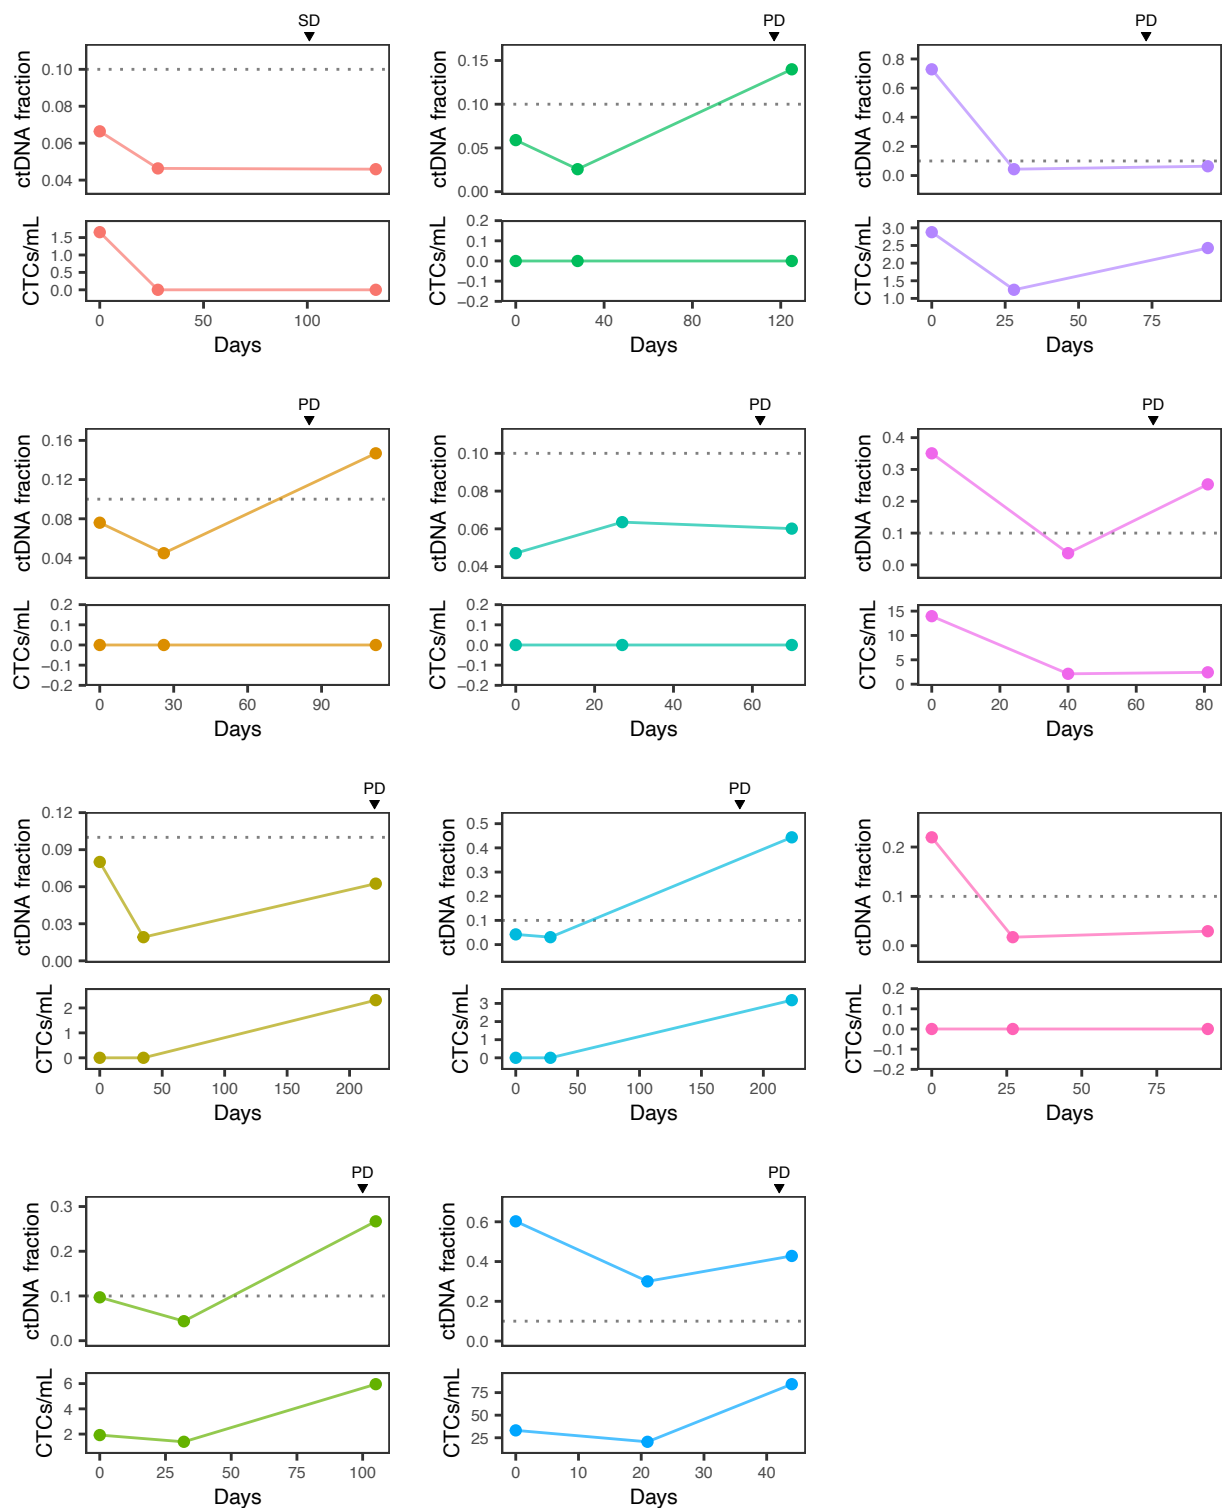

**Supplementary Figure S2.** LBx dynamics for 11 patients with three consecutive study draws. (Top to bottom, left to right) Patients 2, 7, 11, 14, 15, 19, 20, 21, 24, 25, 27. LBx timepoints correspond to the first day of two cycles of therapy, plus the start of the next line of therapy. Disease status prior to the change in therapy is shown. (PD, progressive disease; SD, stable disease)

Supplementary Table 1

| Gene             | Alteration(s)                                                                                                     | Cancer types                                       | Drugs (for therapeutic implications only)       |
|------------------|-------------------------------------------------------------------------------------------------------------------|----------------------------------------------------|-------------------------------------------------|
| BRAF             | V600E                                                                                                             | All Solid Tumors (excluding Colorectal Cancer)     | Dabrafenib + Trametinib                         |
| ERBB2            | Amplification                                                                                                     | Breast Cancer                                      | Ado-Trastuzumab Emtansine                       |
| ERBB2            | Amplification                                                                                                     | Breast Cancer                                      | Lapatinib + Capecitabine, Lapatinib + Letrozole |
| ERBB2            | Amplification                                                                                                     | Breast Cancer                                      | Margetuximab + Chemotherapy                     |
| ERBB2            | Amplification                                                                                                     | Breast Cancer                                      | Neratinib, Neratinib + Capecitabine             |
| ERBB2            | Amplification                                                                                                     | Breast Cancer                                      | Trastuzumab + Pertuzumab + Chemotherapy         |
| ERBB2            | Amplification                                                                                                     | Breast Cancer                                      | Trastuzumab + Tucatinib + Capecitabine          |
| ERBB2            | Amplification                                                                                                     | Breast Cancer                                      | Trastuzumab Deruxtecan                          |
| ERBB2            | Amplification                                                                                                     | Breast Cancer                                      | Trastuzumab, Trastuzumab + Chemotherapy         |
| ESR1             | D538, E380, L469V, L536, S463P, Y537                                                                              | Breast Cancer                                      | Elaeostatin                                     |
| NTRK1            | Fusions                                                                                                           | All Solid Tumors                                   | Entrectinib                                     |
| NTRK1            | Fusions                                                                                                           | All Solid Tumors                                   | Larotrectinib                                   |
| NTRK2            | Fusions                                                                                                           | All Solid Tumors                                   | Entrectinib                                     |
| NTRK2            | Fusions                                                                                                           | All Solid Tumors                                   | Larotrectinib                                   |
| NTRK3            | Fusions                                                                                                           | All Solid Tumors                                   | Entrectinib                                     |
| NTRK3            | Fusions                                                                                                           | All Solid Tumors                                   | Larotrectinib                                   |
| Other Biomarkers | Microsatellite Instability-High                                                                                   | All Solid Tumors                                   | Pembrolizumab                                   |
| Other Biomarkers | Tumor Mutational Burden-High                                                                                      | All Solid Tumors                                   | Pembrolizumab                                   |
| PIK3CA           | C420R, E542K, E545A, E545D, E545G, E545K, H1047L, H1047R, H1047Y, Q546E, Q546R                                    | Breast Cancer                                      | Alpelisib + Fulvestrant                         |
| PIK3CA           | Oncogenic Mutations (excluding C420R, E542K, E545A, E545D, E545G, E545K, Q546E, Q546R, H1047L, H1047R and H1047Y) | Breast Cancer                                      | Alpelisib + Fulvestrant                         |
| RET              | Fusions                                                                                                           | All Solid Tumors (excluding Thyroid Cancer, NSCLC) | Selpercatinib                                   |
| NTRK1            | G595R                                                                                                             | All Solid Tumors                                   | Larotrectinib                                   |
| NTRK3            | F617L                                                                                                             | All Solid Tumors                                   | Larotrectinib                                   |
| NTRK3            | G623R                                                                                                             | All Solid Tumors                                   | Larotrectinib                                   |
| NTRK3            | G696A                                                                                                             | All Solid Tumors                                   | Larotrectinib                                   |

**Supplementary Table 2**

| <b>Patient</b> | <b>ER</b> | <b>PR</b> | <b>HER2</b>    | <b>Histological subtype</b> |
|----------------|-----------|-----------|----------------|-----------------------------|
| 1              | Positive  | Positive  | Negative       | Ductal                      |
| 2              | Positive  | Positive  | Negative       | Ductal                      |
| 3              | Negative  | Negative  | Negative       | Ductal                      |
| *4             | no data   | no data   | no data        | Other                       |
| 5              | Positive  | Positive  | Negative       | Ductal                      |
| 6              | Positive  | Positive  | Negative       | Other                       |
| 7              | Negative  | Negative  | Negative       | Ductal                      |
| 8              | Negative  | Negative  | Negative       | Ductal                      |
| 9              | Positive  | Positive  | Negative       | Ductal                      |
| 10             | Positive  | Positive  | Negative       | Lobular                     |
| 11             | Negative  | Negative  | Negative       | Ductal                      |
| 12             | Positive  | Positive  | Negative       | Lobular                     |
| 13             | Negative  | Negative  | Negative       | Ductal                      |
| 14             | Positive  | Negative  | Negative       | Lobular                     |
| 15             | Positive  | Negative  | Negative       | Ductal                      |
| 16             | Positive  | no data   | Negative       | Ductal                      |
| 17             | Negative  | Negative  | Negative       | Ductal                      |
| 18             | Negative  | Negative  | Negative       | Ductal                      |
| 19             | Positive  | Positive  | Negative       | Ductal                      |
| 20             | Positive  | Positive  | Negative       | Ductal                      |
| 21             | Positive  | Positive  | Negative       | Ductal                      |
| 22             | Negative  | Negative  | Overexpressing | Ductal                      |
| 23             | Negative  | Negative  | Negative       | Ductal                      |
| 24             | Positive  | Positive  | Negative       | Ductal                      |
| 25             | Positive  | Positive  | Negative       | Lobular                     |
| 26             | Negative  | Positive  | Negative       | Ductal                      |
| 27             | Negative  | Negative  | Negative       | Ductal                      |
| 28             | Positive  | Positive  | Overexpressing | Ductal                      |
| 29             | Positive  | Positive  | Negative       | Ductal                      |
| 30             | Negative  | Negative  | Negative       | Ductal                      |
| 31             | Positive  | Positive  | Negative       | Lobular                     |
| 32             | Positive  | Positive  | Overexpressing | Ductal                      |
| 33             | Negative  | Positive  | Overexpressing | Ductal                      |
| 34             | Positive  | Positive  | Negative       | Ductal                      |
| 35             | Positive  | Negative  | Negative       | Ductal                      |
| 36             | Positive  | Negative  | no data        | Ductal                      |
| 37             | Positive  | Positive  | Negative       | Ductal                      |
| 38             | Negative  | Negative  | Negative       | Ductal                      |

\*Note: Patient had prior mastectomies for both breasts for ADH (left) and DCIS (right).

Supplementary Table 3

| Patient | Number of samples analyzed | Timepoints analyzed                                                    | Number of samples analyzed by the FoundationACT | Number of samples analyzed by the PanCancer ctDNA assay | Number of samples analyzed by the Oncomine Breast cfDNA Assay v2 | Number of cfDNA samples analyzed by low-pass WGS |
|---------|----------------------------|------------------------------------------------------------------------|-------------------------------------------------|---------------------------------------------------------|------------------------------------------------------------------|--------------------------------------------------|
| 1       | 4                          | T3C1D1, T3C2D3, T4C1D1, T4C2D1                                         | 4                                               | 4                                                       | 0                                                                | 3                                                |
| 2       | 6                          | T1C1D1, T1C2D1, T2C1D1, T2C2D1, T3C1D1, T3C2D1                         | 6                                               | 6                                                       | 0                                                                | 6                                                |
| 3       | 3                          | T1C1D1, T1C2D1, T3C1D1                                                 | 3                                               | 3                                                       | 2                                                                | 3                                                |
| 4       | 2                          | T1C1D1, T1C2D1                                                         | 2                                               | 2                                                       | 1                                                                | 2                                                |
| 5       | 4                          | T1C1D1, T1C2D1, T2C2D1, T3C2D1                                         | 4                                               | 4                                                       | 4                                                                | 4                                                |
| 6       | 1                          | T1C1D1                                                                 | 1                                               | 1                                                       | 1                                                                | 1                                                |
| 7       | 6                          | T1C1D1, T1C2D1, T2C1D1, T2C2D1, T3C1D1, T3C2D1                         | 6                                               | 6                                                       | 0                                                                | 6                                                |
| 8       | 1                          | T1C2D1                                                                 | 1                                               | 1                                                       | 1                                                                | 1                                                |
| 9       | 3                          | T1C1D1, T1C2D1, T1C2D2                                                 | 2                                               | 2                                                       | 0                                                                | 2                                                |
| 10      | 2                          | T1C1D1, T1C2D1                                                         | 2                                               | 2                                                       | 1                                                                | 2                                                |
| 11      | 3                          | T1C1D1, T1C2D1, T2C1D1                                                 | 3                                               | 2                                                       | 1                                                                | 3                                                |
| 12      | 2                          | T1C1D1, T1C2D1                                                         | 2                                               | 2                                                       | 0                                                                | 2                                                |
| 13      | 2                          | T1C1D1, T1C2D1                                                         | 2                                               | 2                                                       | 0                                                                | 2                                                |
| 14      | 4                          | T1C1D1, T1C2D1, T2C1D1, T2C2D1                                         | 4                                               | 4                                                       | 0                                                                | 4                                                |
| 15      | 4                          | T1C1D1, T1C2D1, T2C1D1, T2C2D1                                         | 4                                               | 2                                                       | 0                                                                | 4                                                |
| 16      | 2                          | T1C1D1, T1C2D1                                                         | 0                                               | 2                                                       | 0                                                                | 2                                                |
| 17      | 1                          | T1C2D1                                                                 | 1                                               | 1                                                       | 0                                                                | 1                                                |
| 18      | 1                          | T1C2D1                                                                 | 1                                               | 0                                                       | 0                                                                | 1                                                |
| 19      | 9                          | T1C1D1, T1C2D1, T2C1D1, T3C1D1, T3C2D1, T4C1D1, T4C2D1, T5C1D1, T5C2D1 | 7                                               | 9                                                       | 2                                                                | 9                                                |
| 20      | 5                          | T1C1D1, T1C2D1, T2C1D1, T2C2D1, T3C1D1                                 | 5                                               | 5                                                       | 0                                                                | 5                                                |
| 21      | 3                          | T1C1D1, T1C2D1, T2C1D1                                                 | 2                                               | 3                                                       | 3                                                                | 3                                                |
| 22      | 3                          | T1C1D1, T2C1D1, T2C2D1                                                 | 3                                               | 3                                                       | 1                                                                | 3                                                |
| 23      | 2                          | T1C1D1, T1C2D1                                                         | 2                                               | 2                                                       | 2                                                                | 2                                                |
| 24      | 6                          | T1C1D1, T1C2D1, T2C1D1, T2C2D1, T4C1D1, T4C2D1                         | 6                                               | 6                                                       | 2                                                                | 6                                                |
| 25      | 4                          | T1C1D1, T1C2D1, T2C1D1, T2C2D1                                         | 4                                               | 4                                                       | 2                                                                | 4                                                |
| 26      | 2                          | T1C1D1, T1C2D1                                                         | 1                                               | 2                                                       | 0                                                                | 2                                                |
| 27      | 4                          | T1C1D1, T1C2D1, T2C1D1, T2C2D1                                         | 4                                               | 3                                                       | 0                                                                | 4                                                |
| 28      | 2                          | T1C1D1, T1C1D20                                                        | 1                                               | 2                                                       | 0                                                                | 2                                                |
| 29      | 2                          | T1C1D1, T1C2D1                                                         | 2                                               | 2                                                       | 0                                                                | 2                                                |
| 30      | 1                          | T1C1D1                                                                 | 1                                               | 1                                                       | 0                                                                | 1                                                |
| 31      | 2                          | T1C1D1, T1C2D1                                                         | 2                                               | 2                                                       | 0                                                                | 2                                                |
| 32      | 1                          | T1C1D1                                                                 | 1                                               | 1                                                       | 0                                                                | 1                                                |
| 33      | 2                          | T1C1D1, T1C2D1                                                         | 2                                               | 2                                                       | 0                                                                | 2                                                |
| 34      | 2                          | T1C1D1, T1C2D1                                                         | 1                                               | 2                                                       | 0                                                                | 2                                                |
| 35      | 1                          | T1C1D1                                                                 | 1                                               | 1                                                       | 0                                                                | 1                                                |
| 36      | 2                          | T1C1D1, T1C2D1                                                         | 2                                               | 0                                                       | 0                                                                | 2                                                |
| 37      | 1                          | T1C2D1                                                                 | 1                                               | 0                                                       | 0                                                                | 1                                                |
| 38      | 2                          | T1C1D1, T1C2D1                                                         | 2                                               | 0                                                       | 0                                                                | 2                                                |
| Total   | 107                        |                                                                        | 98                                              | 96                                                      | 23                                                               | 105                                              |

Supplementary Table 4

| Patient | Visit   | ctDNA fraction |
|---------|---------|----------------|
| 1       | T3C1D1  | 0.0307         |
| 1       | T4C1D1  | 0.08197        |
| 1       | T4C2D1  | 0.1155         |
| 2       | T1C1D1  | 0.06642        |
| 2       | T1C2D1  | 0.04633        |
| 2       | T2C1D1  | 0.04591        |
| 2       | T2C2D1  | 0.04429        |
| 2       | T3C1D1  | 0.04318        |
| 2       | T3C2D1  | 0.02398        |
| 3       | T1C1D1  | 0.3552         |
| 3       | T1C2D1  | 0.0661         |
| 3       | T3C1D1  | 0.5622         |
| 4       | T1C1D1  | 0.02439        |
| 4       | T1C2D1  | 0.03647        |
| 5       | T1C1D1  | 0.8825         |
| 5       | T1C2D1  | 0.3922         |
| 5       | T2C2D1  | 0.5114         |
| 5       | T3C2D1  | 0.3328         |
| 6       | T1C1D1  | 0.3623         |
| 7       | T1C1D1  | 0.07599        |
| 7       | T1C2D1  | 0.04488        |
| 7       | T2C1D1  | 0.1468         |
| 7       | T2C2D1  | 0.1973         |
| 7       | T3C1D1  | 0.1303         |
| 7       | T3C2D1  | 0.01972        |
| 8       | T1C2D1  | 0.09495        |
| 9       | T1C1D1  | 0.07982        |
| 9       | T1C2D1  | 0.02136        |
| 10      | T1C1D1  | 0.03118        |
| 10      | T1C2D1  | 0.04106        |
| 11      | T1C1D1  | 0.08006        |
| 11      | T1C2D1  | 0.01914        |
| 11      | T2C1D1  | 0.06249        |
| 12      | T1C1D1  | 0.04509        |
| 12      | T1C2D1  | 0.03131        |
| 13      | T1C1D1  | 0.06915        |
| 13      | T1C2D1  | 0.07177        |
| 14      | T1C1D1  | 0.09698        |
| 14      | T1C2D1  | 0.0436         |
| 14      | T2C1D1  | 0.2669         |
| 14      | T2C2D1  | 0.09102        |
| 15      | T1C1D1  | 0.05896        |
| 15      | T1C2D1  | 0.02572        |
| 15      | T2C1D1  | 0.1399         |
| 15      | T2C2D1  | 0.2061         |
| 16      | T1C1D1  | 0.02689        |
| 16      | T1C2D1  | 0.0425         |
| 17      | T1C2D1  | 0.03782        |
| 18      | T1C2D1  | 0.204          |
| 19      | T1C1D1  | 0.04711        |
| 19      | T1C2D1  | 0.06355        |
| 19      | T2C1D1  | 0.06012        |
| 19      | T3C1D1  | 0.1657         |
| 19      | T3C2D1  | 0.01705        |
| 19      | T4C1D1  | 0.0282         |
| 19      | T4C2D1  | 0.06161        |
| 19      | T5C1D1  | 0.1434         |
| 19      | T5C2D1  | 0.16           |
| 20      | T1C1D1  | 0.0421         |
| 20      | T1C2D1  | 0.03058        |
| 20      | T2C1D1  | 0.4436         |
| 20      | T2C2D1  | 0.3193         |
| 20      | T3C1D1  | 0.3957         |
| 21      | T1C1D1  | 0.6023         |
| 21      | T1C2D1  | 0.3003         |
| 21      | T2C1D1  | 0.4281         |
| 22      | T1C1D1  | 0.1279         |
| 22      | T2C1D1  | 0.06662        |
| 22      | T2C2D1  | 0.02715        |
| 23      | T1C1D1  | 0.3436         |
| 23      | T1C2D1  | 0.03516        |
| 24      | T1C1D1  | 0.7289         |
| 24      | T1C2D1  | 0.04366        |
| 24      | T2C1D1  | 0.06383        |
| 24      | T2C2D1  | 0.1022         |
| 24      | T4C1D1  | 0.059          |
| 24      | T4C2D1  | 0.05816        |
| 25      | T1C1D1  | 0.3507         |
| 25      | T1C2D1  | 0.03687        |
| 25      | T2C1D1  | 0.0263         |
| 25      | T2C2D1  | 0.2532         |
| 26      | T1C1D1  | 0.01148        |
| 26      | T1C2D1  | 0.03016        |
| 27      | T1C1D1  | 0.2197         |
| 27      | T1C2D1  | 0.01727        |
| 27      | T2C1D1  | 0.02936        |
| 27      | T2C2D1  | 0.025          |
| 28      | T1C1D1  | 0.01558        |
| 28      | T1C1D20 | 0              |
| 29      | T1C1D1  | 0.3672         |
| 29      | T1C2D1  | 0.1222         |
| 30      | T1C1D1  | 0.2486         |
| 31      | T1C1D1  | 0.4569         |
| 31      | T1C2D1  | 0.04514        |
| 32      | T1C1D1  | 0.015          |
| 33      | T1C1D1  | 0.07134        |
| 33      | T1C2D1  | 0.3562         |
| 34      | T1C1D1  | 0.04128        |
| 34      | T1C2D1  | 0.03844        |
| 35      | T1C1D1  | 0.6168         |
| 36      | T1C1D1  | 0.1152         |
| 36      | T1C2D1  | 0.02865        |
| 37      | T1C2D1  | 0.02448        |
| 38      | T1C1D1  | 0.04145        |
| 38      | T1C2D1  | 0.02197        |
